# Supplementary figures and images for: Investigation into the effect of Si doping on the performance of SrFeO3−δ SOFC electrode materials
Source: Royal Society of Chemistry journal article supplement (doi:10.1039/c3ta12113e), 2013-01-01

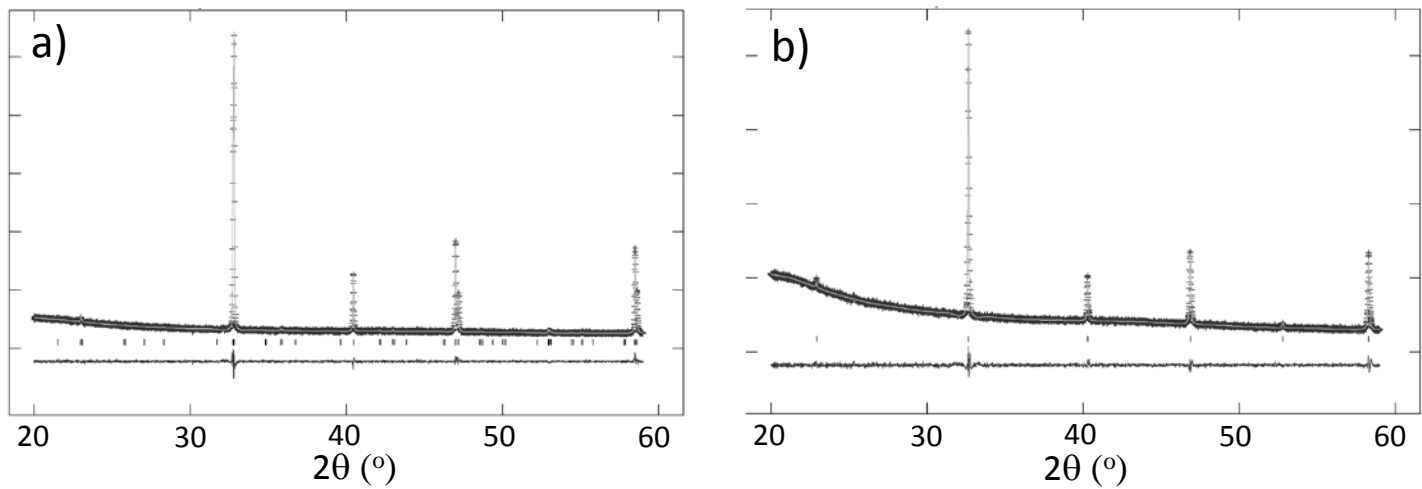

**Figure S1**

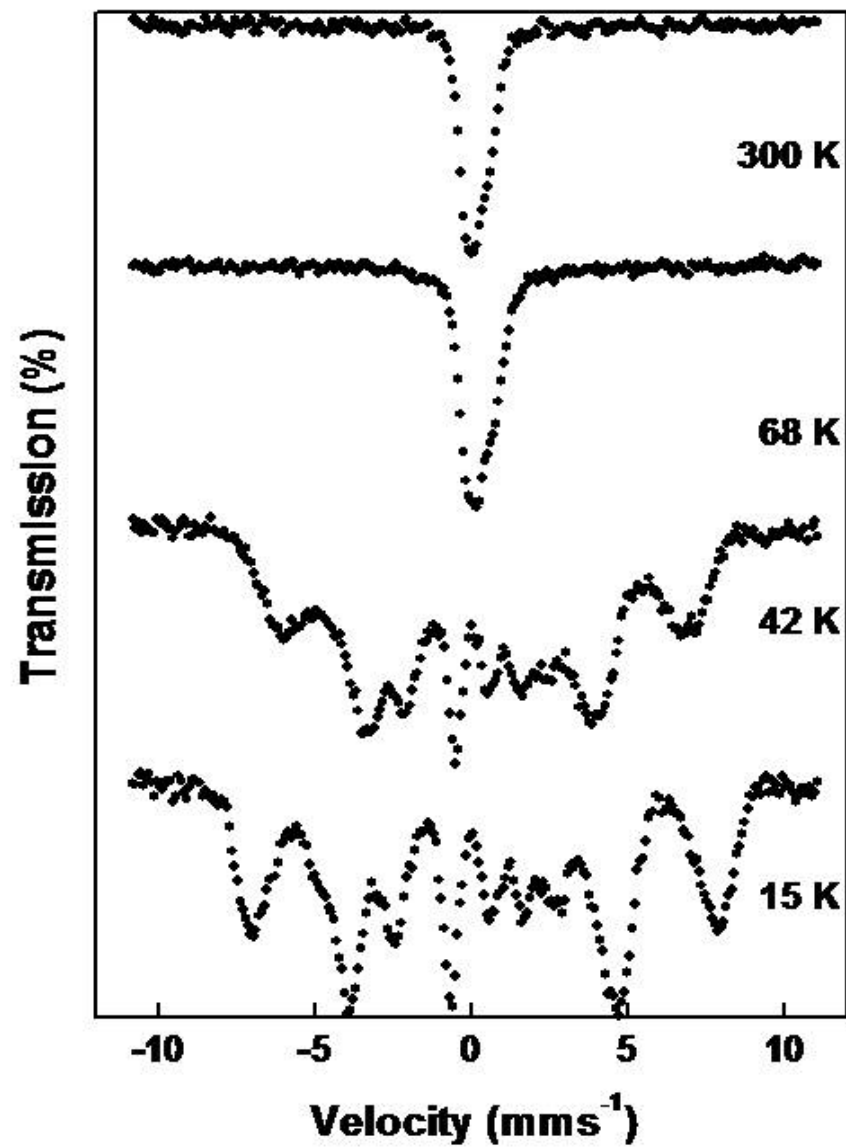

Figure S2

Supplement: c3ta12113e_2.pdf [file c3ta12113e_2.pdf]
